# Supplementary material for: Improving the Rice Photosynthetic Efficiency and Yield by Editing OsHXK1 via CRISPR/Cas9 System
Source: MDPI journal article supplement (doi:10.3390/ijms22179554), 2021-09-02
Supplement: s1 [file s1]

Supplementary Information:

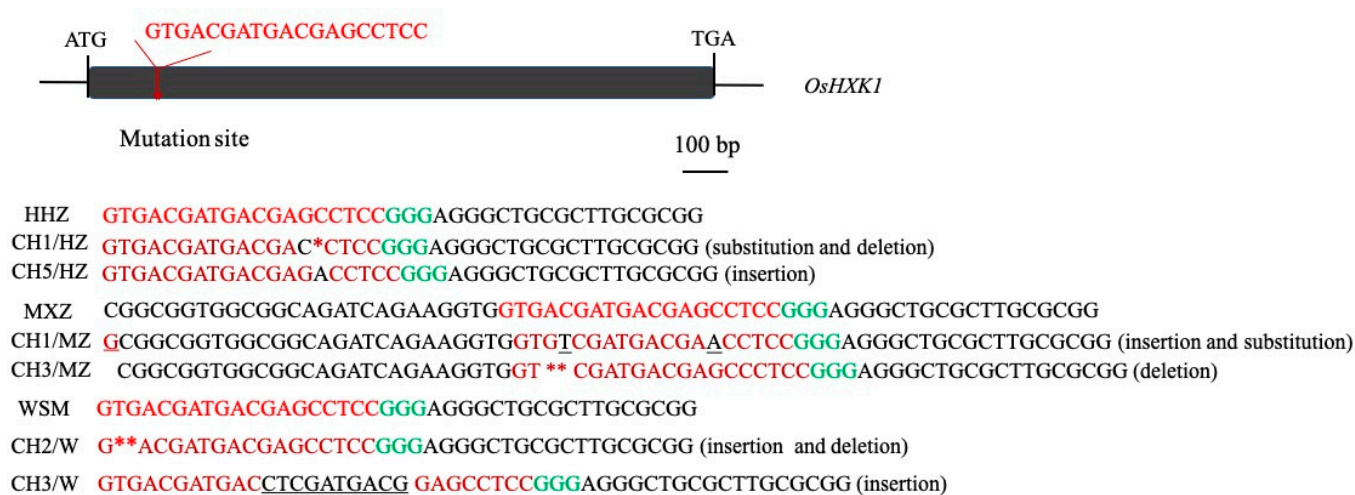

**Figure S1. Mutation analysis of *OsHKK1*-Cas9-transformed plants of the three varieties.** \* represents a deletion, and A, T, G, and C represent inserted and mutated bases, respectively.

| Target site |          | GGTGACGATGACGAGCCTCC GGG |           |              |                             |
|-------------|----------|--------------------------|-----------|--------------|-----------------------------|
| chromosome  | position | sequence                 | off score | gene         | No. of plants with mutation |
| chr02       | 24754156 | GATGACGAGGATGTGCCTCCGGG  | 0.15      | Os02g0621800 | 0                           |
| chr12       | 22482824 | GGTGACGATGAACAGCACCCGGG  | 0.06      | Os12g0553050 | 0                           |
| chr12       | 19199542 | GGTGACGCTGGAGAGGCTCCGGG  | 0.031     | Os12g0503200 | 0                           |
| chr06       | 8876530  | GGGGAAGATGACGCTCCTCCGGG  | 0.014     | Os06g0267400 | 0                           |
| chr04       | 25341229 | GGCGACGATGACGAGCCGCGCGG  | 0.008     | Os04g0507100 | 0                           |
| chr04       | 28854194 | GACGACGAGGACGAGCCTCCGGC  | 0.005     | Os04g0572800 | 0                           |
| chr03       | 35429871 | GGTGTCGCCGACGAGCCTCCGGC  | 0.003     | Os03g0842900 | 0                           |
| chr04       | 34596920 | GGCGTCGATGGCGAGCCTCCGGT  | 0.002     | Os04g0677200 | 0                           |

**Figure S2. Analysis of missed detection of *OsHKK1* targets in *OsHKK1*-Cas9-transformed plants.** The green bases represent protospacer adjacent motif (PAM) sites.

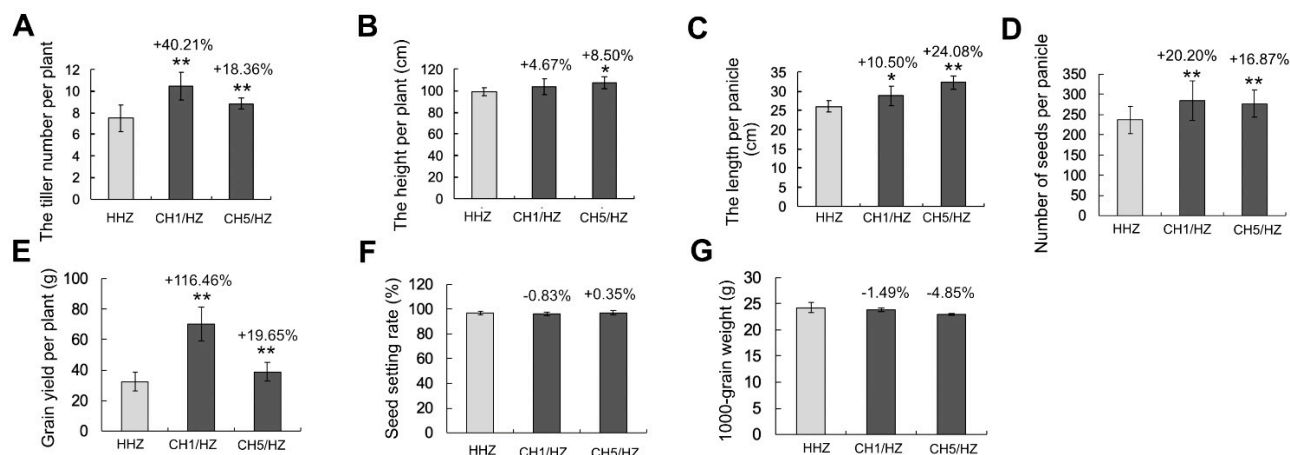

**Figure S3. Yield traits of HHZ and *OsHXX1-Cas9* plants seeded in the spring.**

(A) Tiller number of HHZ, CH1/HZ, and CH5/HZ plants. (B) Height of HHZ, CH1/HZ, and CH5/HZ plants. (C) Length per panicle of HHZ, CH1/HZ, and CH5/HZ plants. (D) Number of grains per panicle of HHZ, CH1/HZ, and CH5/HZ plants. (E) Single-plant yield of HHZ, CH1/HZ, and CH5/HZ plants. (F) Seed setting rate of HHZ, CH1/HZ, and CH5/HZ plants. (G) 1000-grain weight of HHZ, CH1/HZ, and CH5/HZ plants. Shown are the means  $\pm$  SDs; \*,  $0.01 \leq P < 0.05$ ; \*\*,  $0.001 \leq P < 0.01$ , according to Student's *t*-test.

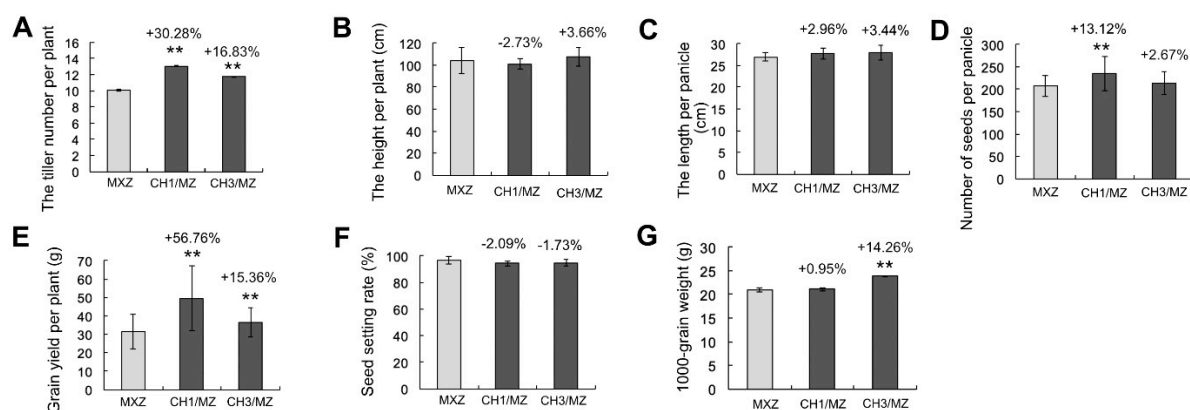

**Figure S4. Yield traits of MXZ and *OsHXX1-Cas9* plants seeded in the spring.**

(A) Tiller number of MXZ, CH1/MZ, and CH3/MZ plants. (B) Height of MXZ, CH1/MZ, and CH3/MZ plants. (C) Length per panicle of MXZ, CH1/MZ, and CH3/MZ plants. (D) Number of grains per panicle of MXZ, CH1/MZ, and CH3/MZ plants. (E) Single-plant yield of MXZ, CH1/MZ, and CH3/MZ plants. (F) Seed setting rate of MXZ, CH1/MZ, and CH3/MZ plants. (G) 1000-grain weight of MXZ, CH1/MZ, and CH3/MZ plants. Shown are the means  $\pm$  SDs; \*,  $0.01 \leq P < 0.05$ ; \*\*,  $0.001 \leq P < 0.01$ , according to Student's *t*-test.

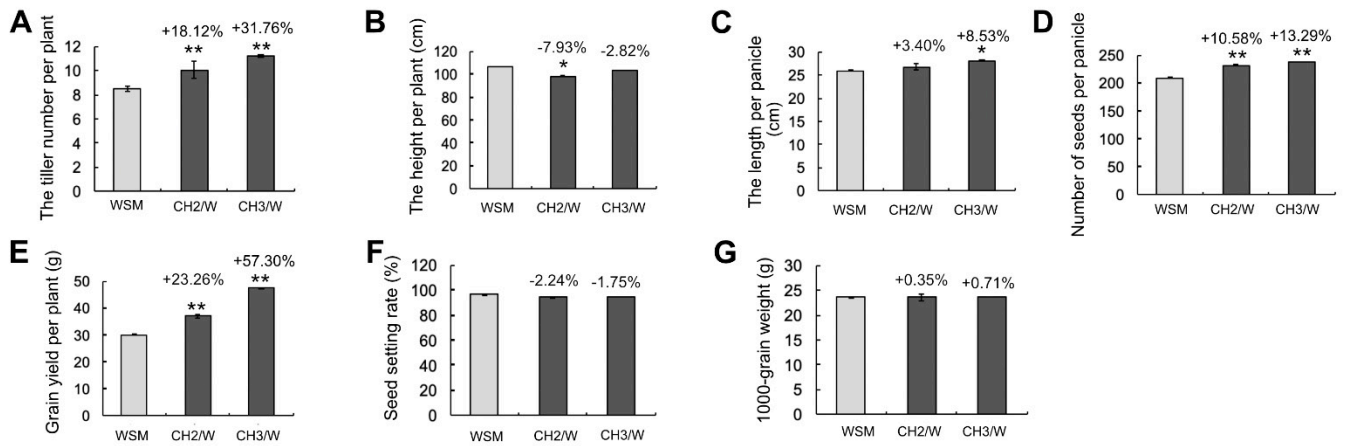

**Figure S5. Yield traits of WSM and *OsHXX1-Cas9* plants seeded in the spring.**

(A) Tiller number of WSM, CH2/W, and CH3/W plants. (B) Height of WSM, CH2/W, and CH3/W plants. (C) Length per panicle of WSM, CH2/W, and CH3/W plants. (D) Number of grains per panicle of WSM, CH2/W, and CH3/W plants. (E) Single-plant yield of WSM, CH2/W, and CH3/W plants. (F) Seed setting rate of WSM, CH2/W, and CH3/W plants. (G) 1000-grain weight of WSM, CH2/W, and CH3/W plants. Shown are the means  $\pm$  SDs; \*,  $0.01 \leq P < 0.05$ ; \*\*,  $0.001 \leq P < 0.01$ , according to Student's *t*-test.



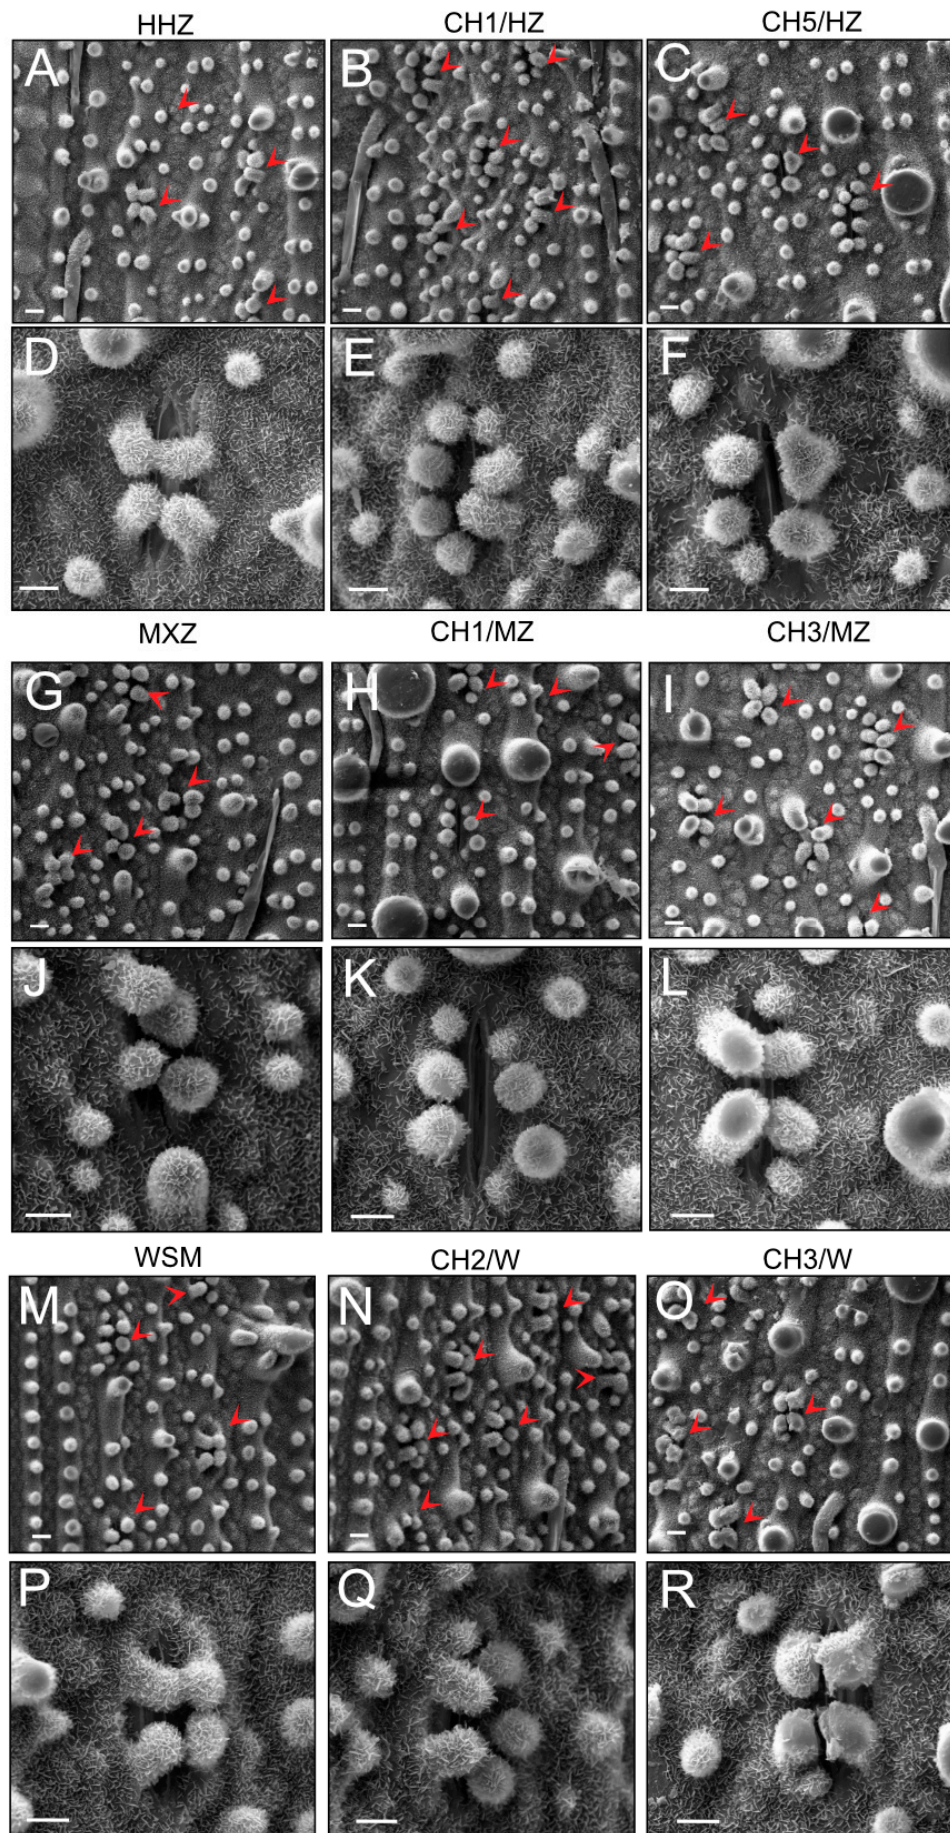

**Figure S6. The scanning electron microscopy (SEM) images of stomatal apertures in *OsHXX1-Cas9* plants.** (A) – (C), (G) – (I), (M) – (O), The SEM observation (3000 $\times$ ) on stomata of outer epidermis under leaves of wildtype and the *OsHXX1-Cas9* plants. The stomata are marked by the red triangle. Bars = 2  $\mu$ m. (D) – (F), (J) – (L), (P) – (R), The SEM observation (10,000 $\times$ ) observation on stomata of outer epidermis under leaves of wildtype and the *OsHXX1-Cas9* plants. Bars = 2  $\mu$ m.

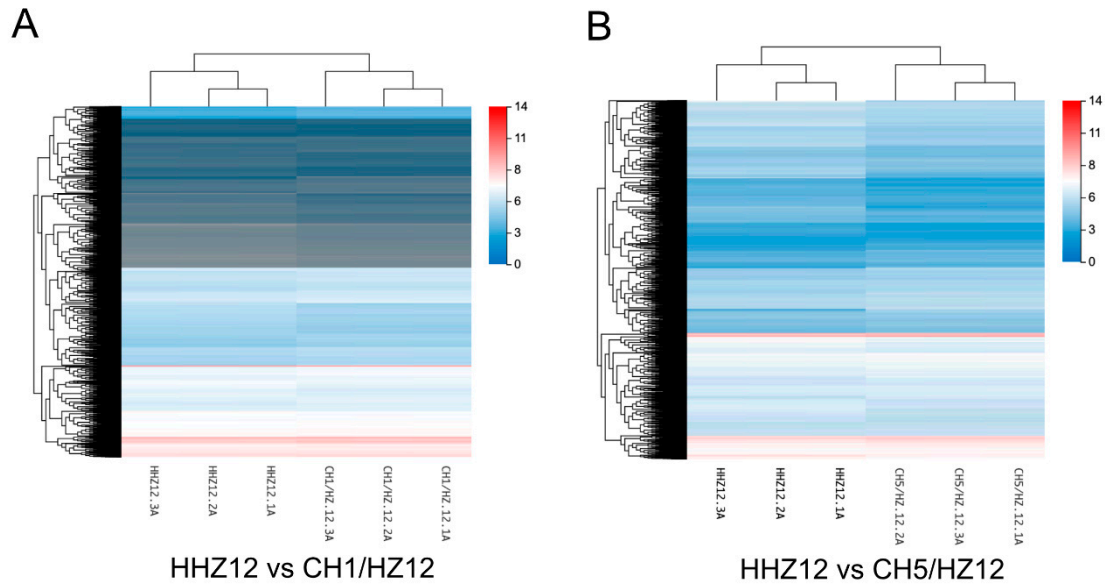

**Figure S7. Cluster heat maps of DEGs in HHZ12-CH1/HZ and HHZ12-CH5/HZ** (A) Cluster heat maps of DEGs in the HHZ12 vs CH1/HZ comparison group. (B) Cluster heat map of DEGs in the HHZ12 vs CH5/HZ comparison group. The horizontal axis represents the log<sub>2</sub>(FC) (expression value + 1), and the vertical axis shows the genes. Under the default color matching, the redder the color is, the higher the expression, and the bluer the color is, the lower the expression.

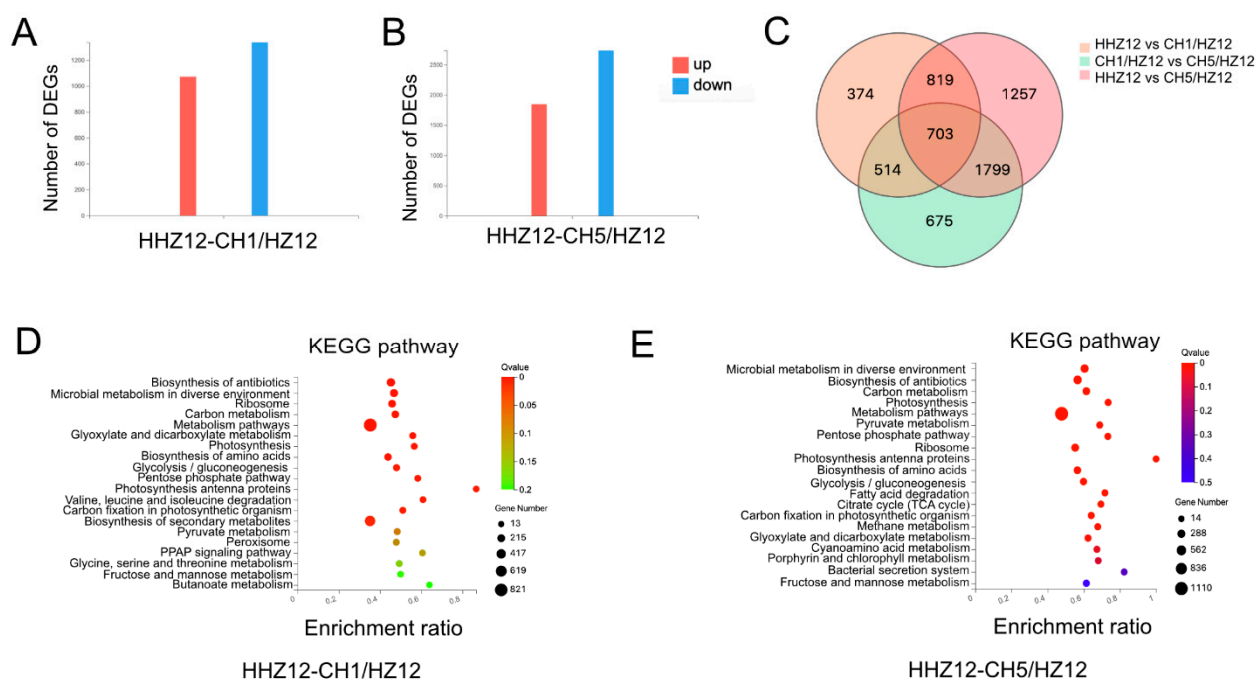

**Figure S8. Analysis of DEGs screened by transcriptome sequencing.** (A)–(B) The number of up- and downregulated DEGs ( $\log_2(\text{FC}) \geq 0.6$ ) in the HHZ12-CH1/HZ and HHZ12-CH5/HZ comparison groups. (C) Venn diagram showing the number of common DEGs in the HHZ12-CH1/HZ and HHZ12-CH5/HZ comparison groups ( $\log_2(\text{FC}) \geq 0.6$ ). (D)–(E) KEGG analysis of DEGs in the HHZ12-CH1/HZ and HHZ12-CH5/HZ comparison groups. The X-axis represents the enrichment ratio (the ratio of the number of genes annotated to an entry in the selected gene set to the total number of genes annotated to the entry in the species; the formula is  $\text{Enrichment ratio} = \text{Term candidate gene number} / \text{Term gene number}$ ), the Y-axis lists the KEGG pathways, the size of the bubbles represents the number of genes annotated to each KEGG pathway, and the color represents the enrichment significance value (Q value). The redder the color is, the smaller the significance value.

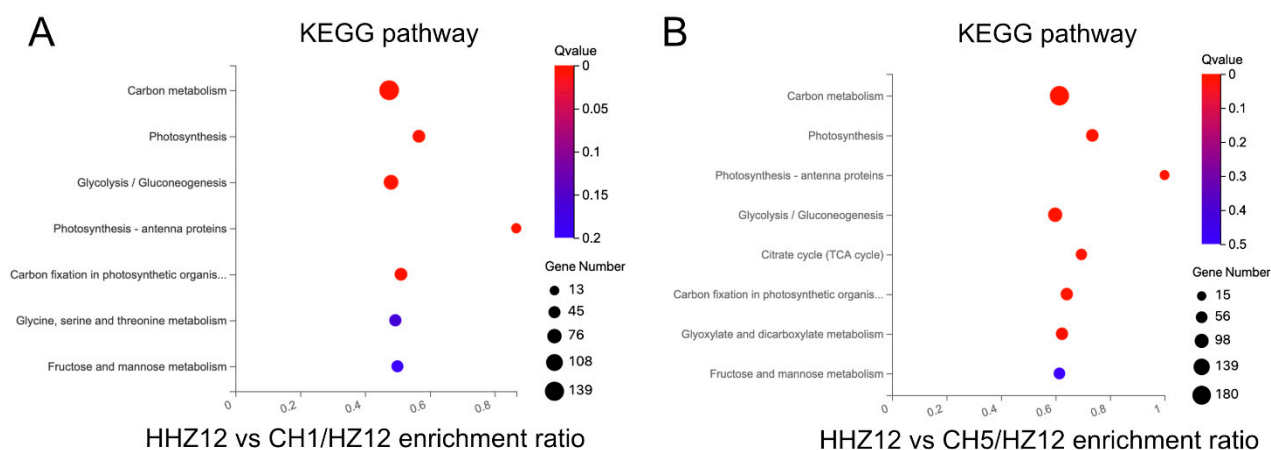

**Figure S9. Kyoto Encyclopedia of Genes and Genomes (KEGG) pathway analysis of DEGs associated with photosynthesis-related metabolic pathways in the HHZ12 vs CH1/HZ and CH5/HZ comparison groups.** (A)–(B) KEGG pathway analysis of DEGs in the HHZ12 vs CH1/HZ and CH5/HZ comparison groups. The X-axis represents the enrichment ratio (the ratio of the number of genes annotated to an entry in the selected gene set to the total number of genes annotated to the entry in this species; the formula is Enrichment ratio = Term candidate gene number/Term gene number), the Y-axis lists the KEGG pathways, the size of the bubbles represents the number of genes annotated to each KEGG pathway, and the color represents the enrichment significance value (Q value). The redder the color is, the smaller the significance value.

**A**

| Group | 29 | 54 | 102 | 263 | 316 |
|-------|----|----|-----|-----|-----|
| I     | D  | M  | F   | S   | G   |
| II    | A  | T  | F   | A   | G   |
| III   | A  | T  | Y   | A   | G   |
| IV    | A  | T  | F   | S   | R   |

**B**

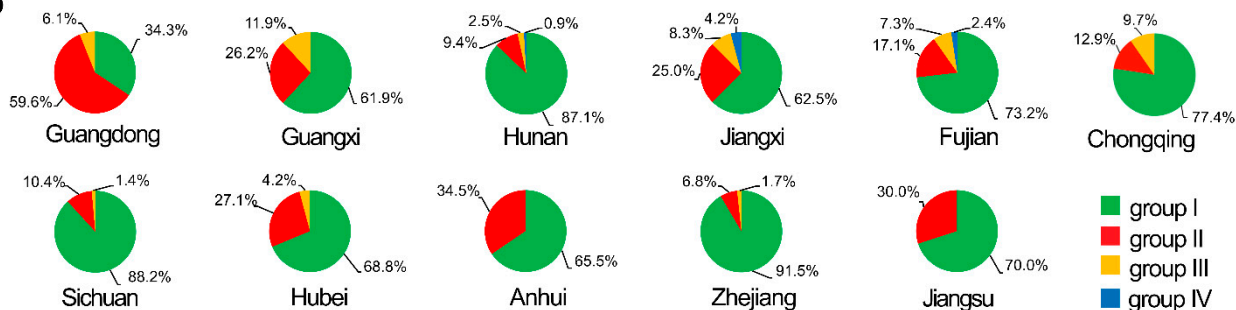

**Figure S10. Haplotype distribution percentage of *OsHXK1* in eleven provinces of China.** (A) The distribution type groups of *OsHXK1* haplotype analysis. (B) The Haplotype distribution percentage of *OsHXK1* in eleven provinces of China.



**Table S1.** *OsH XKI-Cas9* HHZ rice plant quality analysis.

| lines  | Head rice<br>recovery<br>(mm) | Amylose<br>(%) | Milled rice<br>rate (%) | Brown rice<br>rate (%) | Protein<br>(%) | Clarity |
|--------|-------------------------------|----------------|-------------------------|------------------------|----------------|---------|
| HHZ    | 70.00 ± 4.00                  | 18.90 ± 0.30   | 67.00 ± 0.50            | 78.10 ± 0.60           | 7.76 ± 0.10    | /       |
| CH1/HZ | 73.00 ± 3.00                  | 18.90 ± 0.10   | 65.00 ± 0.20            | 79.20 ± 0.50           | 8.40 ± 0.10    | Level 1 |
| CH5/HZ | 60.00 ± 2.00                  | 18.60 ± 0.10   | 66.30 ± 1.00            | 78.50 ± 0.40           | 9.11 ± 0.10    | Level 1 |

**Table S2.** MXZ *OsH XKI-Cas9* rice plant quality analysis.

| lines  | Head rice<br>recovery<br>(mm) | Amylose<br>(%) | Milled rice<br>rate (%) | Brown rice<br>rate (%) | Protein<br>(%) | Clarity |
|--------|-------------------------------|----------------|-------------------------|------------------------|----------------|---------|
| MXZ    | 67.00 ± 6.00                  | 17.80 ± 0.20   | 65.30 ± 1.10            | 78.40 ± 0.30           | 8.20 ± 0.20    | Level 1 |
| CH1/MZ | 64.00 ± 4.00                  | 18.90 ± 0.10   | 66.00 ± 1.40            | 78.40 ± 0.40           | 8.35 ± 0.10    | Level 1 |
| CH3/MZ | 74.00 ± 0.00                  | 17.20 ± 0.40   | 65.50 ± 1.20            | 78.80 ± 0.60           | 7.89 ± 0.40    | Level 1 |

**Table S3.** WSM *OsH XKI-Cas9* rice plant quality analysis.

| lines | Head rice<br>recovery<br>(mm) | Amylose<br>(%) | Milled rice<br>rate (%) | Brown rice<br>rate (%) | Protein<br>(%) | Clarity |
|-------|-------------------------------|----------------|-------------------------|------------------------|----------------|---------|
| WSM   | 55.00 ± 3.00                  | 17.50 ± 0.10   | 66.30 ± 0.50            | 79.70 ± 0.50           | 9.00 ± 0.10    | /       |
| CH2/W | 56.00 ± 1.00                  | 17.40 ± 0.30   | 68.00 ± 1.10            | 78.60 ± 0.40           | 9.31 ± 0.20    | Level 1 |
| CH3/W | 59.00 ± 1.00                  | 17.90 ± 0.40   | 65.50 ± 0.70            | 79.40 ± 0.40           | 9.10 ± 0.30    | Level 1 |

**Table S4.** Photosynthesis-related genes in the CH1/HZ and CH5/HZ comparison groups.

| Gene ID | log <sub>2</sub> (CZ1-12/HHZ12) | log <sub>2</sub> (CZ5-12/HHZ12) | Gene annotation                        |
|---------|---------------------------------|---------------------------------|----------------------------------------|
| 4352014 | 0.74542                         | 1.63064                         | Calvin cycle                           |
| 4332690 | 0.77394                         | 1.11244                         | Porphyrin and chlorophyll metabolism   |
| 4343515 | 0.6849                          | 1.89106                         | Photosynthesis                         |
| 4327544 | 0.61604                         | 1.11339                         | Photosystem II oxygen-evolving complex |
| 4332745 | 0.77453                         | 1.47579                         | Photosystem II repair protein PSB27-H1 |



| 9271010   | 6.99173                       | 7.90648                       | Phosphoglycolate phosphatase activity                                 |
|-----------|-------------------------------|-------------------------------|-----------------------------------------------------------------------|
| 4328925   | 1.07088                       | 1.40265                       | Chloroplast thylakoid membrane protein complex                        |
| 4327018   | 0.64306                       | 0.69205                       | Chloroplast thylakoid membrane                                        |
| 9269069   | 1.08966                       | 1.79622                       | Chloroplast outer membrane                                            |
| 4352264   | 0.61112                       | 0.86897                       | NAD(P)H-quinone oxidoreductase, subunit U, chloroplastic              |
| 4347691   | 0.74734                       | 0.93246                       | Triosephosphate isomerase, chloroplastic                              |
| 4343189   | 0.70055                       | 1.05024                       | Photosynthetic electron transport in photosystem I                    |
| 4352021   | 1.15317                       | 1.69537                       | Ribulose biphosphate carboxylase                                      |
| 4331495   | 0.60145                       | 0.9113                        | Glyceraldehyde 3-phosphate dehydrogenase, NAD(P)-binding domain       |
| 4326312   | 0.89629                       | 1.63641                       | Glyoxylate reductase (NADP) activity                                  |
| 4347332   | 0.63786                       | 0.95419                       | Transporter activity                                                  |
| 112937008 | 1.02813                       | 0.86603                       | RuBisCO large subunit                                                 |
| 4351966   | 1.12168                       | 1.37606                       | Ribulose biphosphate carboxylase                                      |
| Gene ID   | $\log_2(\text{CZ1-12/HHZ12})$ | $\log_2(\text{CZ5-12/HHZ12})$ | Gene annotation                                                       |
| 4330512   | 0.84151                       | 1.74334                       | Pyrophosphate-fructose 6-phosphate 1-phosphotransferase subunit alpha |
| 4333006   | 0.81252                       | 0.70941                       | Metal ion transport                                                   |
| 4349044   | 0.87747                       | 1.10369                       | Glutamyl-tRNA reductase, chloroplastic-like                           |
| 4335799   | 0.62521                       | 1.33612                       | Photosystem I Psao                                                    |
| 4324705   | 2.26762                       | 2.56028                       | Chlorophyll a-b binding protein of LHCII type I                       |
| 4336044   | 0.7                           | 0.74725                       | Glyceraldehyde 3-phosphate dehydrogenase                              |
| 4349114   | 0.81938                       | 0.9519                        | Glycine cleavage system H-protein                                     |
| 4336886   | 0.7206                        | 1.01268                       | Thylakoid luminal 29 kDa protein, chloroplastic                       |
| 4343721   | 0.6138                        | 0.68718                       | Geranyl diphosphate biosynthetic process                              |
| 4336028   | 0.65434                       | 1.20113                       | Photosynthesis, light harvesting                                      |
| 4328586   | 0.8363                        | 1.26754                       | Cell redox homeostasis                                                |
| 4329999   | 1.17019                       | 1.67652                       | Electron transfer activity                                            |
| 4326594   | 0.7065                        | 0.90261                       | Glucose-1-phosphate adenylyltransferase activity                      |
| 4344439   | 0.86115                       | 1.05125                       | Ferredoxin-1, chloroplastic-like                                      |
| 4342001   | 0.74165                       | 1.2575                        | Photosystem II repair                                                 |
| 4330835   | 1.49552                       | 2.2451                        | Ferredoxin-nitrite reductase                                          |

$\log_2(\text{FC}) \geq 0.6$  was used as the screening standard for common DEGs.

**Table S5.** Haplotype distribution of *OsHXX1* rice varieties in China.

| Province  | Group I | Group II | Group III | Group IV | Sum |
|-----------|---------|----------|-----------|----------|-----|
| Guangdong | 34      | 59       | 6         | 0        | 99  |
| Guangxi   | 26      | 11       | 5         | 0        | 42  |
| Fujian    | 60      | 14       | 6         | 2        | 82  |
| Jiangxi   | 30      | 12       | 4         | 2        | 48  |

|           |     |     |    |   |     |
|-----------|-----|-----|----|---|-----|
| Hunan     | 277 | 30  | 8  | 3 | 318 |
| Zhejiang  | 54  | 4   | 1  | 0 | 59  |
| Anhui     | 19  | 10  | 0  | 0 | 29  |
| Hubei     | 33  | 13  | 2  | 0 | 48  |
| Jiangsu   | 21  | 9   | 0  | 0 | 30  |
| Chongqing | 24  | 4   | 3  | 0 | 31  |
| Sichuan   | 127 | 15  | 2  | 0 | 144 |
| Total     | 705 | 181 | 37 | 7 | 930 |

**Table S6.** Primers used in this study.

| Primer name     | Sequence (5'-3')        | Objective           |
|-----------------|-------------------------|---------------------|
| HXH1cas9-U3F    | GTTGGTGACGATGACGAGCCTCC | Vector construction |
| HXH1cas9-U3R    | AAACGGAGGCTCGTCATCGTCAC | Vector construction |
| Actin1F         | CACATTCCAGCAGATGTGGA    | qRT-PCR             |
| Actin1R         | GCGATAACAGCTCCTCTTGG    | qRT-PCR             |
| UQ5F            | ACCTTCATGGCCAACCACTT    | qRT-PCR             |
| UQ5R            | CTAAGCCTGCTGGTTGTAGA    | qRT-PCR             |
| GAPDHF          | TACGTTGAGGAGGACCTTG     | qRT-PCR             |
| GAPDHR          | GTCATACCAAGACACAAGCT    | qRT-PCR             |
| RbcS3F          | ACCATCTCAATGGCCTCTGC    | qRT-PCR             |
| RbcS3R          | TGTGTGCATATAGCCGGAGC    | qRT-PCR             |
| LOC_Os07g36080F | ACCAAATCTGCTCTTGGCGA    | qRT-PCR             |
| LOC_Os07g36080R | ACATGGAGGGTACATTGCCG    | qRT-PCR             |
| psbPF           | AACGCCACGATTGAGGACAT    | qRT-PCR             |
| psbPR           | TCGATCTTCTCCACGGAGGT    | qRT-PCR             |
| LOC_Os02g15750F | AGAGCCAACCAGCAATCACA    | qRT-PCR             |
| LOC_Os02g15750R | GCTGCCTCTGTACTGGTCTC    | qRT-PCR             |
| LOC_Os12g31460F | CCAACAAAGCTGGTTGGCTAC   | qRT-PCR             |
| LOC_Os12g31460R | CAGAGCATTCATGGTGACGC    | qRT-PCR             |
| LOC_Os07g28610F | CCATCGACAGGCTTCCACTT    | qRT-PCR             |
| LOC_Os07g28610R | CACCAGAGCTTCCCTGTCTG    | qRT-PCR             |

|                  |                         |          |
|------------------|-------------------------|----------|
| OsRBCS4F         | AACGTTAGGCAGGTGCAGTT    | qRT-PCR  |
| OsRBCS4R         | TGCAGCTTAACACGGACACA    | qRT-PCR  |
| OsRBCS2F         | AGTCTGGTGGCAACTAAGCC    | qRT-PCR  |
| OsRBCS2R         | GCACGGCCGGTAAAATCAAA    | qRT-PCR  |
| LOC_Os04g33830 F | TTCTGGCTGTGGTTGGTGAC    | qRT-PCR  |
| LOC_Os04g33830 R | ATCCGTCCGTACAGTCAAGC    | qRT-PCR  |
| CP24-F           | CCTTAACCTTAACGGCCATTTCC | qRT-PCR  |
| CP24-R           | CCCGCAGTAAAATCCTGAGC    | qRT-PCR  |
| OsFd1F           | AGCAACAAGCTGGGAGACAG    | qRT-PCR  |
| OsFd1R           | GAGTAAGGCAGGTTCGATCCC   | qRT-PCR  |
| OsRBCS5F         | GGAGTCCGGCGGAACTAAG     | qRT-PCR  |
| OsRBCS5R         | GGAAACCAATGCAAGGTGGC    | qRT-PCR  |
| casHXK1-SF       | CGATGACGAGCCTCCGGGAG    | Sequence |
| casHXK1-SR       | GAACCCAAGCTCCCTCTCGC    | Sequence |
| Os02g0621800F    | CGCGCTGGCGCCCTCGCTCC    | Sequence |
| Os02g0621800R    | AGGCAGAAGACCTTGACGAC    | Sequence |
| Os12g0553050F    | ATGTTCTTGATTCCAGGATC    | Sequence |
| Os12g0553050R    | TTAGATCCATGCCATCACAA    | Sequence |
| Os12g0503200F    | TATGAGCAGTCGCCCCATCG    | Sequence |
| Os12g0503200R    | ACCTTCTCCTCTTTCCTCCT    | Sequence |
| Os06g0267400F    | AGGACATGTTTCGCGGCAGGC   | Sequence |
| Os06g0267400R    | TGAACTCCCCCGCGTCTCCCA   | Sequence |
| Os04g0507100F    | GTCTCCGTCTTCGCGTTCCTC   | Sequence |
| Os04g0507100R    | GCCTCCGCTTCATCTTCCCAG   | Sequence |
| Os04g0572800F    | ATCCCTCCCTTAAACCAAGC    | Sequence |
| Os04g0572800R    | AGCGCGCACAGCAGCACGA     | Sequence |
| Os03g0842900F    | TCGCGTACGAGTACGCGCGGA   | Sequence |
| Os03g0842900R    | CATGAGGTGAGGGAACGCGA    | Sequence |
| Os04g0677200F    | AATGCCATCGGCGGCCAGAT    | Sequence |
| Os04g0677200R    | GCGGCGGGGAGCAGGTTGAA    | Sequence |
